# Supplementary material for: Clinical Practice Variation Needs to be Considered in Cost-Effectiveness Analyses: A Case Study of Patients with a Recent Transient Ischemic Attack or Minor Ischemic Stroke
Source: PubMed Central journal article supplement — Appl Health Econ Health Policy. 2015 Apr 28;14:67–75. doi: 10.1007/s40258-015-0167-4 (PMC4740566; doi:10.1007/s40258-015-0167-4), 2015-04-28
Supplement: 40258_2015_167_MOESM1_ESM.pdf [file 40258_2015_167_MOESM1_ESM.pdf]

**Electronic Supplementary Material 1**

**Clinical Practice Variation Needs to be Considered in Cost-Effectiveness Analyses: A Case Study of Patients with a Recent Transient Ischemic Attack or Minor Ischemic Stroke**

Leander R. Buisman\*, Adriana J. Rijnsburger, Heleen M. den Hertog, Aad van der Lugt, William K. Redekop

\*Corresponding author: Leander R. Buisman, MSc, Institute of Health Policy and Management, Institute for Medical Technology Assessment, Erasmus University Rotterdam, PO Box 1738, 3000 DR Rotterdam, The Netherlands, Tel: +31 (0) 10 408 8730, Fax: +31 (0) 10 408 9094, buisman@bmg.eur.nl

Journal: Applied Health Economics and Health Policy

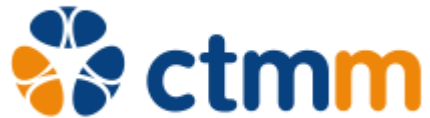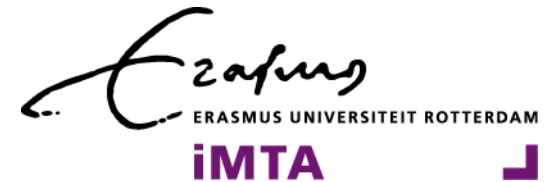

**QUESTIONNAIRE: PRACTICE VARIATION IN THE USE OF DIAGNOSTIC TESTS AND TREATMENT  
CRITERIA IN PATIENTS WITH A RECENT TIA / MINOR ISCHEMIC STROKE**

**Institute for Medical Technology Assessment, Erasmus University Rotterdam, The Netherlands**

This research was performed within the framework of CTMM, the Center for Translational Molecular Medicine ([www.ctmm.nl](http://www.ctmm.nl)), project PARISk (grant 01C-202), and supported by the Dutch Heart Foundation.

**Q1:** In which hospital are you currently working?.....

**Q2:** Which initial test is used to assess the degree of carotid stenosis at the emergency unit/inpatient clinic of your hospital in patients with a TIA or minor ischemic stroke in the past 3 months? (more than 1 answer is possible)

- Duplex ultrasonography (DUS)
- Magnetic resonance angiography - Time of flight (MRA-TOF)
- Other test, namely .....
- Computed tomography angiography (CTA)
- Contrast-enhanced magnetic resonance angiography (CE-MRA)

**Q3:** Which initial test is used to assess the degree of carotid stenosis at the outpatient clinic of your hospital in patients with a TIA or minor ischemic stroke in the past 3 months? (more than 1 answer is possible)

- Duplex ultrasonography (DUS)
- Magnetic resonance angiography - Time of flight (MRA-TOF)
- Other test, namely .....
- Computed tomography angiography (CTA)
- Contrast-enhanced magnetic resonance angiography (CE-MRA)

If a different initial test is used at the emergency unit/inpatient clinic than the one at the outpatient clinic, as answered in question 2 and 3.

----> Go to question 4

If the same initial test is used at the emergency unit/inpatient clinic and outpatient clinic, as answered in question 2 and 3.

----> Go to question 5

**Q4:** What is the reason why different initial tests are used at the emergency unit/inpatient clinic and outpatient clinic?

.....  
.....  
.....  
.....

**Q5:** Is a second (confirmatory) test used to assess the degree of carotid stenosis based on the test result of the initial test at the emergency unit/inpatient clinic of your hospital? If yes, which test(s)? (more than 1 test possible)

- No;
- Yes, namely:  DUS    CTA    TOF-MRA    CE-MRA    DSA

**Q6:** Is a second (confirmatory) test used to assess the degree of carotid stenosis based on the test result of the initial test at the outpatient clinic of your hospital? If yes, which test(s)? (more than 1 test possible)

- No;
- Yes, namely:  DUS    CTA    TOF-MRA    CE-MRA    DSA

**Q7:** Which criteria are used in your hospital to determine if a second (confirmatory) test is needed? (e.g., gender, degree of carotid stenosis found with the initial test, plaque characteristics, etc.)

*Please specify the criteria in the table below. If more space is needed, please use the space below the table.*

| Criteria for confirmatory test |  |  |  |  |  |
|--------------------------------|--|--|--|--|--|
| DUS                            |  |  |  |  |  |
| CTA                            |  |  |  |  |  |
| TOF-MRA                        |  |  |  |  |  |
| CE-MRA                         |  |  |  |  |  |
| DSA                            |  |  |  |  |  |

.....

.....

.....

.....

.....

**Q8:** The Dutch stroke guidelines recommend a DUS as initial test and a MRA or CTA as confirmatory test for women with a  $\geq 70\%$  carotid stenosis and men with a 50-69% carotid stenosis. Does your hospital deviate from the Dutch stroke guidelines?

- Yes ----> Go to question 9
- No ----> Go to question 10

**Q9:** What is the main reason why your hospital deviates from the Dutch stroke guidelines in the use of diagnostic tests in patients with a recent TIA or minor ischemic stroke? (e.g., lack of expertise in certain test, capacity problems, lack of evidence, etc.)

.....  
.....  
.....

**Q10:** Which criteria are used in your hospital to decide which patients should undergo a carotid endarterectomy (CEA)? (e.g., patient characteristics (age and gender), degree of stenosis, time interval between TIA/minor ischemic stroke and CEA, etc.)

.....  
.....  
.....

**Q11:** Besides degree of carotid stenosis, are plaque characteristics used in decisions about which patients should undergo a carotid endarterectomy (CEA)? If yes, which plaque characteristics and which diagnostic test are used for this purpose? (e.g., plaque morphology (ulcerations), plaque compositions (calcifications, CT density, echo density).

.....  
.....  
.....  
.....
