# Supplementary material for: Clinical Practice Variation Needs to be Considered in Cost-Effectiveness Analyses: A Case Study of Patients with a Recent Transient Ischemic Attack or Minor Ischemic Stroke
Source: PubMed Central journal article supplement — Appl Health Econ Health Policy. 2015 Apr 28;14:67–75. doi: 10.1007/s40258-015-0167-4 (PMC4740566; doi:10.1007/s40258-015-0167-4), 2015-04-28
Supplement: 40258_2015_167_MOESM2_ESM.pdf [file 40258_2015_167_MOESM2_ESM.pdf]

## **Electronic Supplementary Material 2**

### **Clinical Practice Variation Needs to be Considered in Cost-Effectiveness Analyses: A Case Study of Patients with a Recent Transient Ischemic Attack or Minor Ischemic Stroke**

Leander R. Buisman\*, Adriana J. Rijnsburger, Heleen M. den Hertog, Aad van der Lugt, William K. Redekop

\*Corresponding author: Leander R. Buisman, MSc, Institute of Health Policy and Management, Institute for Medical Technology Assessment, Erasmus University Rotterdam, PO Box 1738, 3000 DR Rotterdam, The Netherlands, Tel: +31 (0) 10 408 8730, Fax: +31 (0) 10 408 9094, buisman@bmg.eur.nl

Journal: Applied Health Economics and Health Policy

#### **References**

- [1] Hallan S, Asberg A, Indredavik B, Widerøe TE. Quality of life after cerebrovascular stroke: a systematic study of patients' preferences for different functional outcomes. *J Intern Med.* 1999;246(3):309–16.
- [2] Sullivan PW, Ghushchyan V. Mapping the EQ-5D index from the SF-12: US general population preferences in a nationally representative sample. *Med Decis Making.* 2006;26(4):401–9.
- [3] Buisman LR, Tan SS, Nederkoorn PJ, Koudstaal PJ, Redekop WK. Hospital costs of ischemic stroke and transient ischemic attack in the Netherlands. *Neurology.* 2015;84(22) (in press).
- [4] Buskens E, Nederkoorn PJ, Buijs-Van Der Woude T, et al. Imaging of carotid arteries in symptomatic patients: cost-effectiveness of diagnostic strategies. *Radiology.* 2004;233(1):101–12.
- [5] Struijs JN, Van Genugten ML, Evers SM, et al. Future costs of stroke in the Netherlands: the impact of stroke services. *Int J Technol Assess Health Care.* 2006;22(4):518–24.

**Table: Utility values and cost input parameters of the model**

| Parameter                                                | Value   | Source         |
|----------------------------------------------------------|---------|----------------|
| <b>Utilities</b>                                         |         |                |
| Baseline (recent TIA or minor ischemic stroke)           | 0.71    | [1]            |
| After minor ischemic stroke                              | 0.66    | [1,2]          |
| After major ischemic stroke                              | 0.31    | [1]            |
| <b>Costs</b>                                             |         |                |
| Carotid endarterectomy                                   | €6,836  | [3]            |
| Medicines (per year)                                     | €120    | Expert opinion |
| Minor ischemic stroke                                    |         | [4]            |
| first year                                               | €8,433  |                |
| subsequent years (per year)                              | €1,443  |                |
| Major ischemic stroke                                    |         | [4]            |
| first year                                               | €48,095 |                |
| subsequent years (per year)                              | €28,082 |                |
| Fatal ischemic stroke (in year of fatal ischemic stroke) |         | [5]            |
| Men – aged <65                                           | €6,436  |                |
| Men – aged 65-74                                         | €10,505 |                |
| Men – aged 75-85                                         | €8,438  |                |
| Men – aged >85                                           | €10,278 |                |
| Women – aged <65                                         | €7,103  |                |
| Women – aged 65-74                                       | €9,644  |                |
| Women – aged 75-85                                       | €11,632 |                |
| Women – aged >85                                         | €13,992 |                |
